# Supplementary material for: Expected population prevalence following decriminalization of recreational use of cannabis in Sweden
Source: J Cannabis Res. 2026 Feb 13;8:32. doi: 10.1186/s42238-026-00405-z (PMC12930985; doi:10.1186/s42238-026-00405-z)
Supplement: Supplementary file 1 — Supplementary Material 1. [file 42238_2026_405_MOESM1_ESM.docx]

# Supplementary material for: Expected population outcomes following decriminalization of recreational use of cannabis in Sweden

Filip Andersson, MSc1,2, Robert Thiesmeier, MSc1, Cecilia Magnusson, PhD1,2, Nicola Orsini, PhD1,2, Mats Ramstedt, PhD3,4, Maria Rosaria Galanti, PhD1

1Department of Global Public Health, Karolinska Institutet, SE-17177 Stockholm, Sweden; 2Centre for Epidemiology and Community Medicine, Stockholm Health Care District, Stockholm Region, Box 45436 10431 Stockholm, Sweden; 3Department of Clinical Neuroscience, Karolinska Institutet, SE-17177 Stockholm, Sweden; 4The Swedish Council for Information on Alcohol and Other Drugs, Östergötagatan 90 11664 Stockholm, Sweden

# Appendix A1

Table A1 Description of the data sources.

| **Variable** | **Country** | **Source** |
| --- | --- | --- |
| Socio-Demographic index | All | Global Burden of Disease Collaborative Network. Global Burden of Disease Study 2021 (GBD 2021) Socio-Demographic Index (SDI) 1950–2021. Seattle, United States of America: Institute for Health Metrics and Evaluation (IHME), 2024. |
| Gini-coefficient | All – only country level | Gini Coefficient World Bank |
| Gini-coefficient | Hawaii  Louisiana  New Hampshire  North Dakota | [Useful Stats: Income inequality across the states | SSTI](https://ssti.org/blog/useful-stats-income-inequality-across-states) |
| Share with tertiary education | All – only country level, except Australia | https://w3.unece.org/PXWeb2015/pxweb/en/STAT/ |
| Share age 15-24 years old | All – only country level | [All countries compared for People > Age distribution > Population aged 15-24 > Percent](https://www.nationmaster.com/country-info/stats/People/Age-distribution/Population-aged-15--24/Percent#1995) |
| GDP per capita | All – only country level | https://countryeconomy.com/gdp |
| Cannabis use | Australia | National Drug Strategy Household Survey 2022–2023: Cannabis in the NDSHS - Australian Institute of Health and Welfare |
| Cannabis use | Austria, Belgium, Croatia, Czech Republic, Estonia, Italy, Luxemburg, Portugal, Slovenia, Spain, Sweden | EMCDDA – Statistical Bulletin 2004-2024 |
| Cannabis use | Switzerland | [Cannabis consumption (age: 15-64) | MonAM | FOPH](https://ind.obsan.admin.ch/en/indicator/monam/cannabis-consumption-age-15-64) |
| Cannabis use | Hawaii, Louisiana, New Hampshire, North Dakota | [National Survey on Drug Use and Health](https://www.samhsa.gov/data/data-we-collect/nsduh-national-survey-drug-use-and-health) |
| Share with tertiary education | Croatia – added data | [Statistics | Eurostat](https://ec.europa.eu/eurostat/databrowser/view/edat_lfs_9903/default/table?lang=en) |

Table A2 BIC of the estimated models of cannabis use after decriminalization.

|  | **Time**  **[95% CI]** | **Interaction between Time and Gini-coefficient [95% CI]** | **Interaction between Time and SDI**  **[95% CI]** | **Interaction between Time and Share with tertiary education**  **[95% CI]** | **Interaction between Time and Share age 15-24 years old**  **[95% CI]** | **Interaction between Time and GDP per capita**  **[95% CI]** |
| --- | --- | --- | --- | --- | --- | --- |
| **Past 12-month** |  |  |  |  |  |  |
| BIC | 1738·953 | 1732·732 | 1738·556 | 1739·994 | 1710·781 | 1744·510 |
| **Past 30-days** |  |  |  |  |  |  |
| BIC | -11·824 | -13·795 | -15·042 | -129·993 | -12·496 | -12·914 |


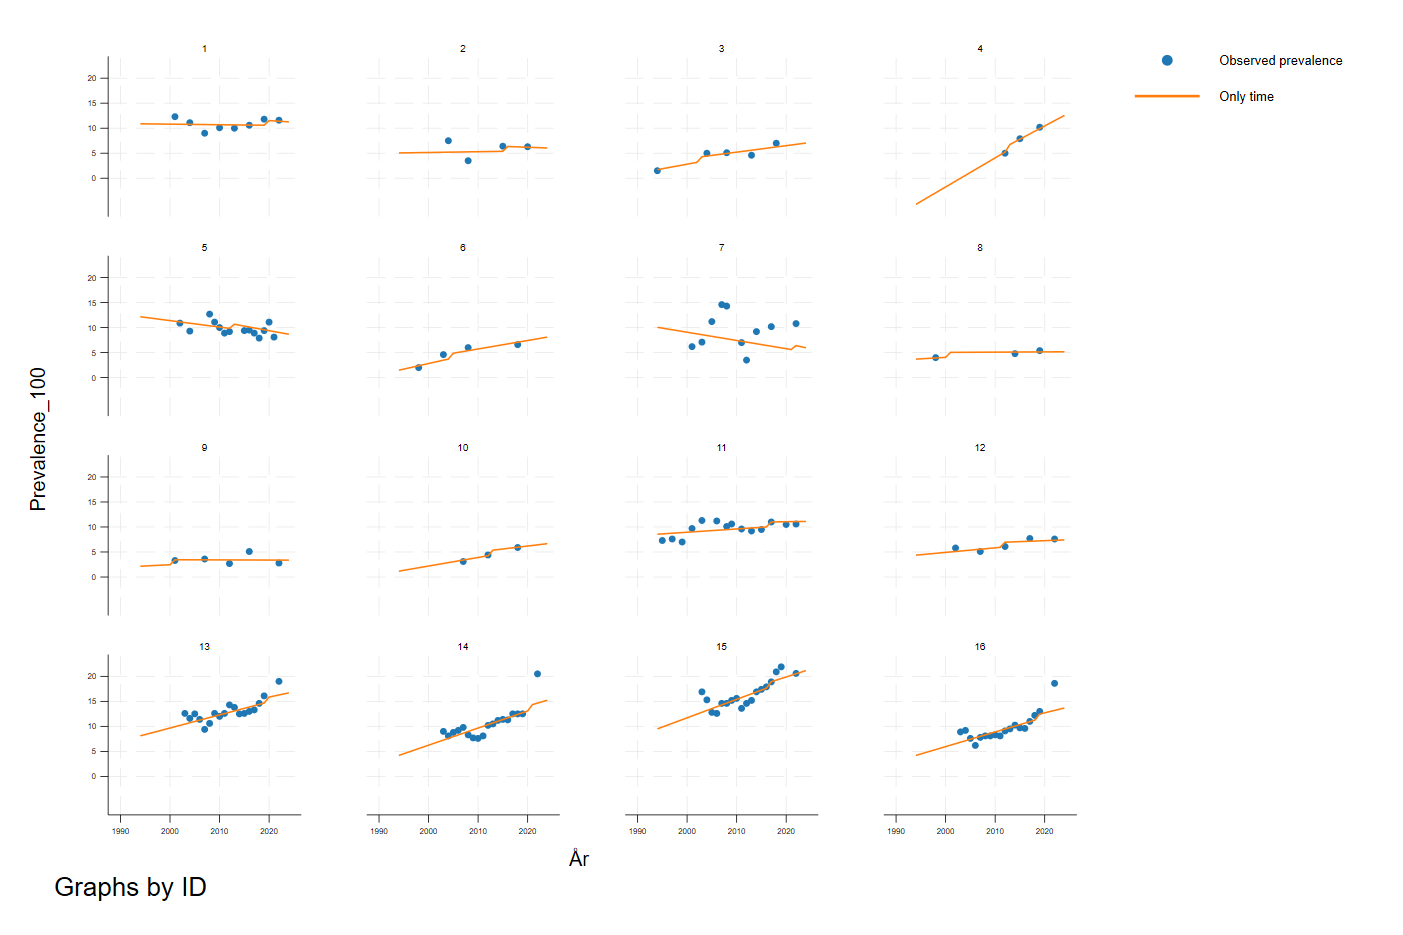


Figure A1 Predicted past 12-month prevalence of cannabis use pre and post decriminalization, by country.


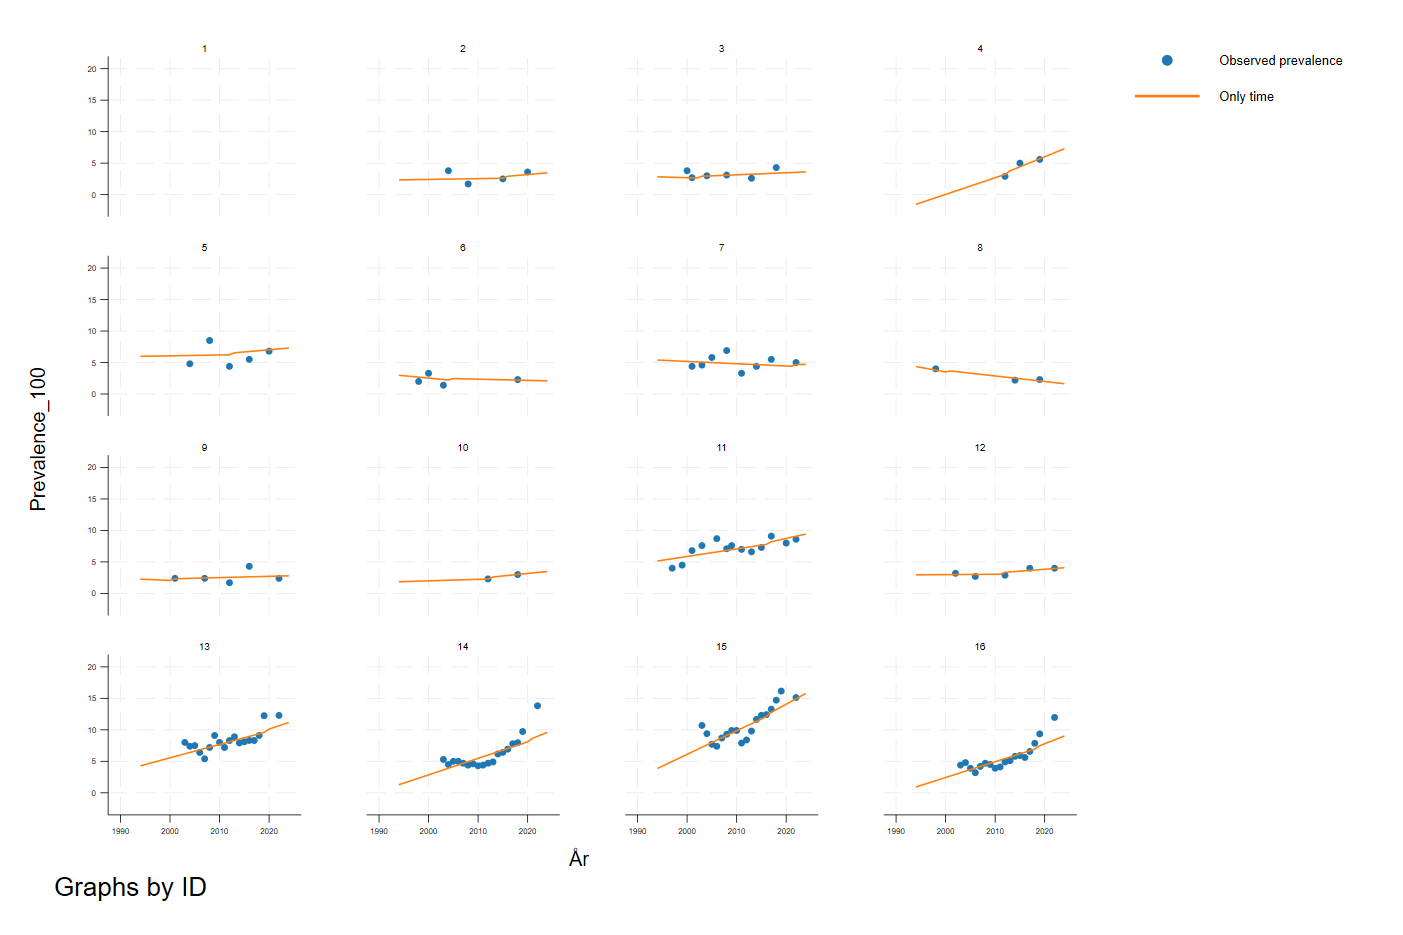


Figure A2 Predicted post 30-days prevalences of cannabis use pre and post decriminalization.
