# Supplementary material for: Expected population prevalence following decriminalization of recreational use of cannabis in Sweden
Source: J Cannabis Res. 2026 Feb 13;8:32. doi: 10.1186/s42238-026-00405-z (PMC12930985; doi:10.1186/s42238-026-00405-z)
Supplement: Supplementary file 2 — Supplementary Material 2. [file 42238_2026_405_MOESM2_ESM.xlsx]

## Sheet: Description
Supplementary material for: Expected population outcomes following decriminalization of recreational use of cannabis in Sweden
Filip Andersson, MSc1,2, Robert Thiesmeier, MSc1, Cecilia Magnusson, PhD1,2, Nicola Orsini, PhD1,2, Mats Ramstedt, PhD3,4, Maria Rosaria Galanti, PhD1
1Department of Global Public Health, Karolinska Institutet, SE-17177 Stockholm, Sweden; 2Centre for Epidemiology and Community Medicine, Stockholm Health Care District, Stockholm Region, Box 45436 10431 Stockholm, Sweden; 3Department of Clinical Neuroscience, Karolinska Institutet, SE-17177 Stockholm, Sweden; 4The Swedish Council for Information on Alcohol and Other Drugs, Östergötagatan 90 11664…
Data description
Variables	Description
Country	Country or State in the US
ID	Identification numer of the country
Year	The year of the observation
year	Year since first observation (1994)
Intervention	Year of decriminalization
T(0=int)	Time since intervention
Xt	0 before intervention, 1 since intervention
Share	% cannabis use past 12-month
Prevalence	Cannabis use past 12-month
Share_M	% cannabis use past 30-days
N	Number of respondents on survey of cannabis use
GDP	Gross domestic product per capita
educ	% of population with tertiary education
GINI	The gini-coefficient
15_24	% of population between age 15 to 24
SDI	The social demographic index

## Sheet: Data
Country	ID	Year	year	Intervention	T(0=int)	Xt	Share	Prevalence	Share_M	N	GDP	educ	GINI	15_24	SDI
Australia	1	1994	0	2020	-26	0					19749		0.33	14.92%	0.742847
Australia	1	1995	1	2020	-25	0					20926		0.33	14.92%	0.747427
Australia	1	1996	2	2020	-24	0					23172		0.33	14.92%	0.751992
Australia	1	1997	3	2020	-23	0					23033		0.33	14.92%	0.756634
Australia	1	1998	4	2020	-22	0					20394		0.33	13.7%	0.761133
Australia	1	1999	5	2020	-21	0					21776		0.33	13.7%	0.765698
Australia	1	2000	6	2020	-20	0					20913		0.33	13.7%	0.770224
Australia	1	2001	7	2020	-19	0	12.3	0.123		10548	19502		0.33	13.7%	0.774663
Australia	1	2002	8	2020	-18	0					21702		0.33	13.7%	0.779361
Australia	1	2003	9	2020	-17	0					27295		0.33	13.9%	0.7836
Australia	1	2004	10	2020	-16	0	11.1	0.111		10987	32863		0.33	13.9%	0.787017
Australia	1	2005	11	2020	-15	0					36257		0.33	13.9%	0.789616
Australia	1	2006	12	2020	-14	0					37981		0.35	13.9%	0.791156
Australia	1	2007	13	2020	-13	0	9	0.09		8747	45208		0.35	13.9%	0.792533
Australia	1	2008	14	2020	-12	0					49199		0.35	14.1%	0.795293
Australia	1	2009	15	2020	-11	0					45772		0.35	14.1%	0.799174
Australia	1	2010	16	2020	-10	0	10.1	0.101		6869	56588		0.35	14.1%	0.803562
Australia	1	2011	17	2020	-9	0					67293		0.35	14.1%	0.80752
Australia	1	2012	18	2020	-8	0					68489		0.34	14.1%	0.811644
Australia	1	2013	19	2020	-7	0	10	0.1		10001	65248		0.34	13.01%	0.816454
Australia	1	2014	20	2020	-6	0					61647		0.34	13.01%	0.820841
Australia	1	2015	21	2020	-5	0					51469		0.34	13.01%	0.824861
Australia	1	2016	22	2020	-4	0	10.6	0.106		9372	51821		0.34	13.01%	0.82856
Australia	1	2017	23	2020	-3	0					55845		0.34	13.01%	0.831798
Australia	1	2018	24	2020	-2	0					56441		0.34	12.37%	0.835355
Australia	1	2019	25	2020	-1	0	11.8	0.118		9534	54391		0.34	12.37%	0.839317
Australia	1	2020	26	2020	0	1					53250		0.34	12.37%	0.842051
Australia	1	2021	27	2020	1	1					64352		0.34	12.37%	0.844253
Australia	1	2022	28	2020	2	1	11.6	0.116		7930	65514		0.34	12.37%	0.844253
Australia	1	2023	29	2020	3	1					67391		0.34	12.41%	0.844253
Australia	1	2024	30	2020	4	1					67391		0.34	12.41%	0.844253
Austria	2	1994	0	2016	-22	0					25726	7.1	0.31	12.55%	0.764704
Austria	2	1995	1	2016	-21	0					30351	7.1	0.3	12.55%	0.769827
Austria	2	1996	2	2016	-20	0					29821		0.29	12.55%	0.774447
Austria	2	1997	3	2016	-19	0					26737		0.29	12.55%	0.779233
Austria	2	1998	4	2016	-18	0					27399		0.31	11.85%	0.783521
Austria	2	1999	5	2016	-17	0					27210	12.5	0.3	11.85%	0.787452
Austria	2	2000	6	2016	-16	0					24636	12.5	0.29	11.85%	0.791848
Austria	2	2001	7	2016	-15	0					24559	12.7	0.29	11.85%	0.79577
Austria	2	2002	8	2016	-14	0					26508	13.2	0.29	11.85%	0.799154
Austria	2	2003	9	2016	-13	0					32299	13.3	0.29	12.38%	0.802043
Austria	2	2004	10	2016	-12	0	7.5	0.075	3.8	3980	36884	16.2	0.3	12.38%	0.804889
Austria	2	2005	11	2016	-11	0					38451	15.9	0.29	12.38%	0.808419
Austria	2	2006	12	2016	-10	0					40675	15.7	0.3	12.38%	0.812065
Austria	2	2007	13	2016	-9	0					46923	15.6	0.31	12.38%	0.815481
Austria	2	2008	14	2016	-8	0	3.5	0.035	1.7	3761	51914	16.2	0.3	12.19%	0.818794
Austria	2	2009	15	2016	-7	0					48112	17.2	0.31	12.19%	0.821541
Austria	2	2010	16	2016	-6	0					46955	17.4	0.3	12.19%	0.8245
Austria	2	2011	17	2016	-5	0					51452	17.4	0.31	12.19%	0.828002
Austria	2	2012	18	2016	-4	0					48617	17.8	0.3	12.19%	0.831113
Austria	2	2013	19	2016	-3	0					50747	18.5	0.31	11.67%	0.83368
Austria	2	2014	20	2016	-2	0					51814	26.4	0.31	11.67%	0.835839
Austria	2	2015	21	2016	-1	0	6.4	0.064	2.5	3477	44268	26.9	0.31	11.67%	0.83758
Austria	2	2016	22	2016	0	1					45279	27.8	0.31	11.67%	0.839884
Austria	2	2017	23	2016	1	1					47321	28.4	0.3	11.67%	0.843173
Austria	2	2018	24	2016	2	1					51234	29.0	0.31	10.65%	0.846614
Austria	2	2019	25	2016	3	1					50192	29.9	0.3	10.65%	0.849863
Austria	2	2020	26	2016	4	1	6.3	0.063	3.6	4650	48837	30.2	0.3	10.65%	0.85202
Austria	2	2021	27	2016	5	1					53696	30.7	0.31	10.65%	0.853837
Austria	2	2022	28	2016	6	1					52501	30.7	0.31	10.65%	0.853837
Austria	2	2023	29	2016	7	1					56856	30.7	0.31	10.16%	0.853837
Austria	2	2024	30	2016	8	1					56856	30.7	0.31	10.16%	0.853837
Belgium	3	1994	0	2003	-9	0	1.5	0.015		2259	23624	19.1	0.28	12.53%	0.758904
Belgium	3	1995	1	2003	-8	0					28458	19.1	0.28	12.53%	0.76317
Belgium	3	1996	2	2003	-7	0					27535		0.27	12.53%	0.766826
Belgium	3	1997	3	2003	-6	0					24879		0.27	12.53%	0.770814
Belgium	3	1998	4	2003	-5	0					25399		0.27	12.06%	0.774228
Belgium	3	1999	5	2003	-4	0					25309	22.5	0.33	12.06%	0.777041
Belgium	3	2000	6	2003	-3	0			3.8	694	23137	22.5	0.33	12.06%	0.780396
Belgium	3	2001	7	2003	-2	0			2.7	7347	23067	23.0	0.33	12.06%	0.784713
Belgium	3	2002	8	2003	-1	0					25044	23.5	0.28	12.06%	0.788836
Belgium	3	2003	9	2003	0	1					30708	24.2	0.28	12.04%	0.792014
Belgium	3	2004	10	2003	1	1	5	0.05	3	6636	35498	25.2	0.31	12.04%	0.795225
Belgium	3	2005	11	2003	2	1					36945	26.0	0.29	12.04%	0.798497
Belgium	3	2006	12	2003	3	1					38842	26.8	0.28	12.04%	0.801573
Belgium	3	2007	13	2003	4	1					44497	27.1	0.29	12.04%	0.804613
Belgium	3	2008	14	2003	5	1	5.1	0.051	3.1	6792	48493	27.4	0.28	12.16%	0.807758
Belgium	3	2009	15	2003	6	1					44892	28.4	0.29	12.16%	0.811056
Belgium	3	2010	16	2003	7	1					44448	30.0	0.28	12.16%	0.81503
Belgium	3	2011	17	2003	8	1					47564	29.8	0.28	12.16%	0.81947
Belgium	3	2012	18	2003	9	1					44824	30.4	0.27	12.16%	0.824226
Belgium	3	2013	19	2003	10	1	4.6	0.046	2.6	4931	46849	30.5	0.28	11.49%	0.82862
Belgium	3	2014	20	2003	11	1					47897	31.9	0.28	11.49%	0.832425
Belgium	3	2015	21	2003	12	1					41147	32.1	0.28	11.49%	0.835878
Belgium	3	2016	22	2003	13	1					42076	32.5	0.28	11.49%	0.839463
Belgium	3	2017	23	2003	14	1					44274	35.1	0.27	11.49%	0.843212
Belgium	3	2018	24	2003	15	1	7	0.07	4.3	3954	47685	35.7	0.27	10.87%	0.846618
Belgium	3	2019	25	2003	16	1					46783	35.8	0.27	10.87%	0.849498
Belgium	3	2020	26	2003	17	1					45615	37.1	0.26	10.87%	0.851347
Belgium	3	2021	27	2003	18	1					52040	39.3	0.27	10.87%	0.853654
Belgium	3	2022	28	2003	19	1					50275	39.3	0.27	10.87%	0.853654
Belgium	3	2023	29	2003	20	1					53854	39.3	0.27	11.3%	0.853654
Belgium	3	2024	30	2003	21	1					53854	39.3	0.27	11.3%	0.853654
Croatia	4	1994	0	2013	-19	0					3683		0.33	13.68%	0.677548
Croatia	4	1995	1	2013	-18	0					4638		0.33	13.68%	0.677029
Croatia	4	1996	2	2013	-17	0					4917		0.33	13.68%	0.679507
Croatia	4	1997	3	2013	-16	0					4832		0.33	13.68%	0.685365
Croatia	4	1998	4	2013	-15	0					5324		0.33	13.75%	0.691366
Croatia	4	1999	5	2013	-14	0					5179		0.33	13.75%	0.696636
Croatia	4	2000	6	2013	-13	0					5053		0.33	13.75%	0.70304
Croatia	4	2001	7	2013	-12	0					5363	13.9	0.33	13.75%	0.709537
Croatia	4	2002	8	2013	-11	0					6215		0.33	13.75%	0.715383
Croatia	4	2003	9	2013	-10	0					8192		0.33	13.08%	0.72113
Croatia	4	2004	10	2013	-9	0					9718		0.33	13.08%	0.726328
Croatia	4	2005	11	2013	-8	0					10452		0.33	13.08%	0.732154
Croatia	4	2006	12	2013	-7	0					11506		0.33	13.08%	0.738067
Croatia	4	2007	13	2013	-6	0					13765		0.33	13.08%	0.743149
Croatia	4	2008	14	2013	-5	0					15897		0.33	11.83%	0.74847
Croatia	4	2009	15	2013	-4	0					14408		0.33	11.83%	0.754066
Croatia	4	2010	16	2013	-3	0					13710		0.32	11.83%	0.759472
Croatia	4	2011	17	2013	-2	0					14659	18.3	0.32	11.83%	0.763686
Croatia	4	2012	18	2013	-1	0	5	0.05	2.9	4756	13460	19.6	0.32	11.83%	0.767405
Croatia	4	2013	19	2013	0	1					14002	20.9	0.32	11.3%	0.771152
Croatia	4	2014	20	2013	1	1					14041	20.9	0.32	11.3%	0.774479
Croatia	4	2015	21	2013	2	1	7.9	0.079	5	4959	12135	20.4	0.31	11.3%	0.777866
Croatia	4	2016	22	2013	3	1					12632	20.7	0.31	11.3%	0.781444
Croatia	4	2017	23	2013	4	1					13649	19.8	0.3	11.3%	0.785075
Croatia	4	2018	24	2013	5	1					15139	18.6	0.3	10.61%	0.788671
Croatia	4	2019	25	2013	6	1	10.2	0.102	5.6	4994	15220	18.0	0.29	10.61%	0.792475
Croatia	4	2020	26	2013	7	1					14372	17.4	0.3	10.61%	0.795462
Croatia	4	2021	27	2013	8	1					17956	16.8	0.29	10.61%	0.798341
Croatia	4	2022	28	2013	9	1					18687	16.0	0.29	10.61%	0.798341
Croatia	4	2023	29	2013	10	1					21521	15.2	0.29	10.22%	0.798341
Croatia	4	2024	30	2013	11	1					21521	15.2	0.29	10.22%	0.798341
Czech Republic	5	1994	0	2013	-19	0					4631		0.27	16.71%	0.72597
Czech Republic	5	1995	1	2013	-18	0					5861		0.26	16.71%	0.737982
Czech Republic	5	1996	2	2013	-17	0					6569		0.26	16.71%	0.746041
Czech Republic	5	1997	3	2013	-16	0					6066		0.26	16.71%	0.75168
Czech Republic	5	1998	4	2013	-15	0					6521		0.26	15.37%	0.757034
Czech Republic	5	1999	5	2013	-14	0					6374	10.7	0.27	15.37%	0.762429
Czech Republic	5	2000	6	2013	-13	0					6049	10.7	0.27	15.37%	0.767766
Czech Republic	5	2001	7	2013	-12	0					6659	10.7	0.27	15.37%	0.772167
Czech Republic	5	2002	8	2013	-11	0	10.9	0.109		2526	8097	11.0	0.27	15.37%	0.776928
Czech Republic	5	2003	9	2013	-10	0					9857	11.2	0.28	13.14%	0.782448
Czech Republic	5	2004	10	2013	-9	0	9.3	0.093	4.8	3526	11785	11.4	0.28	13.14%	0.787126
Czech Republic	5	2005	11	2013	-8	0					13459	12.0	0.27	13.14%	0.791334
Czech Republic	5	2006	12	2013	-7	0					15282	12.5	0.27	13.14%	0.794923
Czech Republic	5	2007	13	2013	-6	0					18514	12.6	0.26	13.14%	0.798254
Czech Republic	5	2008	14	2013	-5	0	12.7	0.127	8.5	6025	22896	13.3	0.26	12.44%	0.801765
Czech Republic	5	2009	15	2013	-4	0	11.1	0.111		1486	19864	14.3	0.26	12.44%	0.804962
Czech Republic	5	2010	16	2013	-3	0	10	0.1		3236	20184	15.3	0.27	12.44%	0.808747
Czech Republic	5	2011	17	2013	-2	0	8.9	0.089		901	22069	16.5	0.26	12.44%	0.812055
Czech Republic	5	2012	18	2013	-1	0	9.2	0.092	4.4	876	20024	17.3	0.26	12.44%	0.81423
Czech Republic	5	2013	19	2013	0	1					20257	18.3	0.26	10.36%	0.815615
Czech Republic	5	2014	20	2013	1	1					20063	18.8	0.26	10.36%	0.816227
Czech Republic	5	2015	21	2013	2	1	9.4	0.094		850	17945	19.3	0.26	10.36%	0.816565
Czech Republic	5	2016	22	2013	3	1	9.5	0.095	5.5	1056	18732	20.1	0.25	10.36%	0.817153
Czech Republic	5	2017	23	2013	4	1	8.9	0.089		1261	20882	20.7	0.25	10.36%	0.819068
Czech Republic	5	2018	24	2013	5	1	7.9	0.079		1665	23662	21.0	0.25	9.06%	0.822034
Czech Republic	5	2019	25	2013	6	1	9.4	0.094		833	24013	20.9	0.25	9.06%	0.824784
Czech Republic	5	2020	26	2013	7	1	11.1	0.111	6.8	2701	23464	21.4	0.26	9.06%	0.826627
Czech Republic	5	2021	27	2013	8	1	8.1	0.081		804	27668	22.8	0.26	9.06%	0.82845
Czech Republic	5	2022	28	2013	9	1					27876	22.8	0.26	9.06%	0.82845
Czech Republic	5	2023	29	2013	10	1					31630	22.8	0.26	10.21%	0.82845
Czech Republic	5	2024	30	2013	11	1					31630	22.8	0.26	10.21%	0.82845
Estonia	6	1994	0	2005	-11	0					1711		0.39	13.77%	0.708456
Estonia	6	1995	1	2005	-10	0					2721		0.39	13.77%	0.713173
Estonia	6	1996	2	2005	-9	0					3380		0.39	13.77%	0.718813
Estonia	6	1997	3	2005	-8	0					3687		0.39	13.77%	0.724652
Estonia	6	1998	4	2005	-7	0	2	0.02	2.0	2317	4096		0.37	14.48%	0.729027
Estonia	6	1999	5	2005	-6	0					4151	27.5	0.37	14.48%	0.733251
Estonia	6	2000	6	2005	-5	0			3.3	8139	4085	27.5	0.37	14.48%	0.739713
Estonia	6	2001	7	2005	-4	0					4520	27.9	0.37	14.48%	0.746602
Estonia	6	2002	8	2005	-3	0					5360	27.7	0.37	14.48%	0.75263
Estonia	6	2003	9	2005	-2	0	4.6	0.046	1.4	1859	7218	28.1	0.37	15.01%	0.757816
Estonia	6	2004	10	2005	-1	0					8925	29.2	0.34	15.01%	0.763224
Estonia	6	2005	11	2005	0	1					10429	32.0	0.33	15.01%	0.769112
Estonia	6	2006	12	2005	1	1					12659	32.3	0.34	15.01%	0.774452
Estonia	6	2007	13	2005	2	1					16766	32.1	0.31	15.01%	0.781074
Estonia	6	2008	14	2005	3	1	6	0.06		1401	18274	33.2	0.32	13.04%	0.788599
Estonia	6	2009	15	2005	4	1					14757	34.6	0.31	13.04%	0.794728
Estonia	6	2010	16	2005	5	1					14697	34.2	0.32	13.04%	0.80083
Estonia	6	2011	17	2005	6	1					17552	35.7	0.32	13.04%	0.806633
Estonia	6	2012	18	2005	7	1					17579	35.1	0.33	13.04%	0.811109
Estonia	6	2013	19	2005	8	1					19311	35.7	0.35	10.62%	0.814887
Estonia	6	2014	20	2005	9	1					20575	36.1	0.35	10.62%	0.818771
Estonia	6	2015	21	2005	10	1					17724	36.4	0.33	10.62%	0.823221
Estonia	6	2016	22	2005	11	1					18661	36.4	0.31	10.62%	0.827364
Estonia	6	2017	23	2005	12	1					20844	36.8	0.3	10.62%	0.830975
Estonia	6	2018	24	2005	13	1	6.6	0.066	2.3	2234	23629	37.2	0.3	10.05%	0.834566
Estonia	6	2019	25	2005	14	1					24024	37.6	0.31	10.05%	0.838574
Estonia	6	2020	26	2005	15	1					23911	38.3	0.31	10.05%	0.841817
Estonia	6	2021	27	2005	16	1					27967	39.3	0.32	10.05%	0.844918
Estonia	6	2022	28	2005	17	1					28469	39.3	0.32	10.05%	0.844918
Estonia	6	2023	29	2005	18	1					30138	39.3	0.32	11.08%	0.844918
Estonia	6	2024	30	2005	19	1					30138	39.3	0.32	11.08%	0.844918
Italy	7	1994	0	2022	-28	0					19043	7.1	0.35	14.09%	0.726871
Italy	7	1995	1	2022	-27	0					20723	7.1	0.35	14.09%	0.731644
Italy	7	1996	2	2022	-26	0					23136		0.35	14.09%	0.736051
Italy	7	1997	3	2022	-25	0					21913		0.37	14.09%	0.739972
Italy	7	1998	4	2022	-24	0					22395		0.37	11.73%	0.743102
Italy	7	1999	5	2022	-23	0					22075	8.6	0.35	11.73%	0.746074
Italy	7	2000	6	2022	-22	0					20206	8.6	0.35	11.73%	0.749676
Italy	7	2001	7	2022	-21	0	6.2	0.062	4.4	6032	20576	8.9	0.35	11.73%	0.753555
Italy	7	2002	8	2022	-20	0					22474	9.2	0.35	11.73%	0.757191
Italy	7	2003	9	2022	-19	0	7.1	0.071	4.6	11869	27673	9.3	0.35	10.32%	0.760094
Italy	7	2004	10	2022	-18	0					31452	10.4	0.34	10.32%	0.762788
Italy	7	2005	11	2022	-17	0	11.2	0.112	5.8	27995	32148	10.9	0.34	10.32%	0.76569
Italy	7	2006	12	2022	-16	0					33603	11.4	0.34	10.32%	0.768402
Italy	7	2007	13	2022	-15	0	14.6	0.146		7289	37989	12.0	0.33	10.32%	0.770698
Italy	7	2008	14	2022	-14	0	14.3	0.143	6.9	10940	40969	12.6	0.34	10.04%	0.773068
Italy	7	2009	15	2022	-13	0					37143	12.7	0.34	10.04%	0.775499
Italy	7	2010	16	2022	-12	0					35964	12.9	0.35	10.04%	0.778109
Italy	7	2011	17	2022	-11	0	7	0.07	3.3	14919	38476	13.0	0.35	10.04%	0.780703
Italy	7	2012	18	2022	-10	0	3.5	0.035		18898	34926	13.6	0.35	10.04%	0.783091
Italy	7	2013	19	2022	-9	0					35723	14.1	0.35	9.84%	0.785357
Italy	7	2014	20	2022	-8	0	9.2	0.092	4.4	6590	36023	14.6	0.35	9.84%	0.787534
Italy	7	2015	21	2022	-7	0					30610	15.1	0.35	9.84%	0.789902
Italy	7	2016	22	2022	-6	0					31358	15.2	0.35	9.84%	0.792477
Italy	7	2017	23	2022	-5	0	10.2	0.102	5.5	10502	32797	16.0	0.36	9.84%	0.795311
Italy	7	2018	24	2022	-4	0					35043	16.7	0.35	9.73%	0.798363
Italy	7	2019	25	2022	-3	0					33767	17.0	0.35	9.73%	0.80153
Italy	7	2020	26	2022	-2	0					31957	17.1	0.35	9.73%	0.803636
Italy	7	2021	27	2022	-1	0					36813	16.8	0.35	9.73%	0.805774
Italy	7	2022	28	2022	0	1	10.8	0.108	5	4011	35654	16.8	0.35	9.73%	0.805774
Italy	7	2023	29	2022	1	1					39012	16.8	0.35	9.76%	0.805774
Italy	7	2024	30	2022	2	1					39012	16.8	0.35	9.76%	0.805774
Luxembourg	8	1994	0	2001	-7	0					43307	14.2	0.28	11.79%	0.797824
Luxembourg	8	1995	1	2001	-6	0					50705	14.2	0.28	11.79%	0.802682
Luxembourg	8	1996	2	2001	-5	0					49719		0.29	11.79%	0.806516
Luxembourg	8	1997	3	2001	-4	0					44203		0.3	11.79%	0.810235
Luxembourg	8	1998	4	2001	-3	0	4	0.04	4.0	3429	45637		0.31	11.38%	0.813889
Luxembourg	8	1999	5	2001	-2	0					49341	16.3	0.3	11.38%	0.817571
Luxembourg	8	2000	6	2001	-1	0					48984	16.3	0.3	11.38%	0.822007
Luxembourg	8	2001	7	2001	0	1					48719	16.2	0.31	11.38%	0.825313
Luxembourg	8	2002	8	2001	1	1					53228	16.9	0.31	11.38%	0.828223
Luxembourg	8	2003	9	2001	2	1					66161	13.1	0.3	11.56%	0.830984
Luxembourg	8	2004	10	2001	3	1					77031	21.5	0.3	11.56%	0.833673
Luxembourg	8	2005	11	2001	4	1					81728	24.5	0.31	11.56%	0.836675
Luxembourg	8	2006	12	2001	5	1					91478	22.2	0.31	11.56%	0.840574
Luxembourg	8	2007	13	2001	6	1					108344	24.7	0.31	11.56%	0.844707
Luxembourg	8	2008	14	2001	7	1					121616	25.9	0.33	11.88%	0.847979
Luxembourg	8	2009	15	2001	8	1					110249	32.0	0.31	11.88%	0.850689
Luxembourg	8	2010	16	2001	9	1					112049	30.1	0.31	11.88%	0.853258
Luxembourg	8	2011	17	2001	10	1					120526	32.8	0.32	11.88%	0.856217
Luxembourg	8	2012	18	2001	11	1					113954	35.2	0.34	11.88%	0.859789
Luxembourg	8	2013	19	2001	12	1					121423	36.6	0.32	12.75%	0.863369
Luxembourg	8	2014	20	2001	13	1	4.8	0.048	2.2	3344	125200	39.5	0.31	12.75%	0.866694
Luxembourg	8	2015	21	2001	14	1					106710	34.1	0.33	12.75%	0.870113
Luxembourg	8	2016	22	2001	15	1					107948	31.0	0.32	12.75%	0.873421
Luxembourg	8	2017	23	2001	16	1					111212	28.6	0.35	12.75%	0.876348
Luxembourg	8	2018	24	2001	17	1					117993	37.9	0.35	12.71%	0.878638
Luxembourg	8	2019	25	2001	18	1	5.4	0.054	2.3	3514	113860	40.0	0.34	12.71%	0.880594
Luxembourg	8	2020	26	2001	19	1					117616	40.4	0.33	12.71%	0.882495
Luxembourg	8	2021	27	2001	20	1					134925	44.5	0.33	12.71%	0.884429
Luxembourg	8	2022	28	2001	21	1					126598	44.5	0.33	12.71%	0.884429
Luxembourg	8	2023	29	2001	22	1					129810	44.5	0.33	0.12	0.884429
Luxembourg	8	2024	30	2001	23	1					129810	44.5	0.33	0.12	0.884429
Portugal	9	1994	0	2001	-7	0					9978		0.39	16.03%	0.629306
Portugal	9	1995	1	2001	-6	0					11787		0.39	16.03%	0.635499
Portugal	9	1996	2	2001	-5	0					12188		0.39	16.03%	0.640865
Portugal	9	1997	3	2001	-4	0					11595		0.39	16.03%	0.646193
Portugal	9	1998	4	2001	-3	0					12217		0.39	14.57%	0.651336
Portugal	9	1999	5	2001	-2	0					12488	7.3	0.39	14.57%	0.656121
Portugal	9	2000	6	2001	-1	0					11531	7.3	0.39	14.57%	0.661611
Portugal	9	2001	7	2001	0	1	3.3	0.033	2.4	14184	11735	7.6	0.39	14.57%	0.667247
Portugal	9	2002	8	2001	1	1					12928	7.7	0.39	14.57%	0.672584
Portugal	9	2003	9	2001	2	1					15794	8.9	0.39	12.42%	0.677663
Portugal	9	2004	10	2001	3	1					18056	10.2	0.39	12.42%	0.682353
Portugal	9	2005	11	2001	4	1					18791	10.4	0.38	12.42%	0.686887
Portugal	9	2006	12	2001	5	1					19840	11.1	0.38	12.42%	0.691159
Portugal	9	2007	13	2001	6	1	3.6	0.036	2.4	12202	22814	11.2	0.37	12.42%	0.694975
Portugal	9	2008	14	2001	7	1					24946	11.6	0.37	10.88%	0.698605
Portugal	9	2009	15	2001	8	1					23126	12.0	0.35	10.88%	0.702223
Portugal	9	2010	16	2001	9	1					22539	12.7	0.36	10.88%	0.706564
Portugal	9	2011	17	2001	10	1					23213	14.1	0.36	10.88%	0.711263
Portugal	9	2012	18	2001	11	1	2.7	0.027	1.7	5355	20577	15.2	0.36	10.88%	0.715804
Portugal	9	2013	19	2001	12	1					21654	15.9	0.36	10.39%	0.719837
Portugal	9	2014	20	2001	13	1					22109	17.5	0.36	10.39%	0.723021
Portugal	9	2015	21	2001	14	1					19252	18.2	0.36	10.39%	0.725756
Portugal	9	2016	22	2001	15	1	5.1	0.051	4.3	9632	19986	19.0	0.35	10.39%	0.728301
Portugal	9	2017	23	2001	16	1					21483	19.3	0.34	10.39%	0.731226
Portugal	9	2018	24	2001	17	1					23573	19.9	0.33	10.45%	0.734403
Portugal	9	2019	25	2001	18	1					23333	20.8	0.33	10.45%	0.73809
Portugal	9	2020	26	2001	19	1					22225	22.5	0.35	10.45%	0.741037
Portugal	9	2021	27	2001	20	1					24839	25.2	0.35	10.45%	0.744152
Portugal	9	2022	28	2001	21	1	2.8	0.028	2.4	8378	24799	25.2	0.35	10.45%	0.744152
Portugal	9	2023	29	2001	22	1					27835	25.2	0.35	10.3%	0.744152
Portugal	9	2024	30	2001	23	1					27835	25.2	0.35	10.3%	0.744152
Slovenia	10	1994	0	2013	-19	0					8474	12.8	0.29	14.72%	0.746235
Slovenia	10	1995	1	2013	-18	0					10756	12.8	0.24	14.72%	0.750995
Slovenia	10	1996	2	2013	-17	0					10792		0.24	14.72%	0.756349
Slovenia	10	1997	3	2013	-16	0					10452		0.24	14.72%	0.762275
Slovenia	10	1998	4	2013	-15	0					11124		0.24	14.68%	0.767729
Slovenia	10	1999	5	2013	-14	0					11458	14.4	0.24	14.68%	0.773236
Slovenia	10	2000	6	2013	-13	0					10194	14.4	0.24	14.68%	0.779578
Slovenia	10	2001	7	2013	-12	0					10398	14.6	0.24	14.68%	0.786241
Slovenia	10	2002	8	2013	-11	0					11666	15.2	0.25	14.68%	0.791806
Slovenia	10	2003	9	2013	-10	0					14736	15.8	0.25	13.27%	0.796372
Slovenia	10	2004	10	2013	-9	0					17125	17.0	0.25	13.27%	0.800962
Slovenia	10	2005	11	2013	-8	0					18023	18.1	0.25	13.27%	0.805601
Slovenia	10	2006	12	2013	-7	0					19614	19.2	0.24	13.27%	0.809709
Slovenia	10	2007	13	2013	-6	0	3.1	0.031		1724	23819	19.7	0.24	13.27%	0.813006
Slovenia	10	2008	14	2013	-5	0					27610	20.1	0.24	11.44%	0.816347
Slovenia	10	2009	15	2013	-4	0					24563	20.8	0.25	11.44%	0.818879
Slovenia	10	2010	16	2013	-3	0					23367	21.2	0.25	11.44%	0.821178
Slovenia	10	2011	17	2013	-2	0					24969	19.8	0.25	11.44%	0.823024
Slovenia	10	2012	18	2013	-1	0	4.4	0.044	2.3	7514	22475	21.0	0.26	11.44%	0.824337
Slovenia	10	2013	19	2013	0	1					23250	21.5	0.26	9.77%	0.825826
Slovenia	10	2014	20	2013	1	1					24030	22.5	0.26	9.77%	0.827799
Slovenia	10	2015	21	2013	2	1					20706	23.3	0.25	9.77%	0.829837
Slovenia	10	2016	22	2013	3	1					21451	24.0	0.25	9.77%	0.831368
Slovenia	10	2017	23	2013	4	1					23300	25.2	0.24	9.77%	0.833038
Slovenia	10	2018	24	2013	5	1	5.9	0.059	3	9161	25988	25.8	0.25	9.22%	0.835472
Slovenia	10	2019	25	2013	6	1					25910	26.3	0.24	9.22%	0.838267
Slovenia	10	2020	26	2013	7	1					25451	26.7	0.24	9.22%	0.840374
Slovenia	10	2021	27	2013	8	1					29194	27.2	0.24	9.22%	0.842431
Slovenia	10	2022	28	2013	9	1					28462	27.2	0.24	9.22%	0.842431
Slovenia	10	2023	29	2013	10	1					32673	27.2	0.24	9.79%	0.842431
Slovenia	10	2024	30	2013	11	1					32673	27.2	0.24	9.79%	0.842431
Spain	11	1994	0	2017	-23	0					13436	14.6	0.35	16.41%	0.665322
Spain	11	1995	1	2017	-22	0	7.3	0.073		8888	15495	14.6	0.36	16.41%	0.671576
Spain	11	1996	2	2017	-21	0					16157		0.36	16.41%	0.677089
Spain	11	1997	3	2017	-20	0	7.6	0.076	4	12515	14811		0.35	16.41%	0.682429
Spain	11	1998	4	2017	-19	0					15485		0.35	14.52%	0.687491
Spain	11	1999	5	2017	-18	0	7	0.07	4.5	12234	15791	19.2	0.34	14.52%	0.692245
Spain	11	2000	6	2017	-17	0					14755	19.2	0.34	14.52%	0.697056
Spain	11	2001	7	2017	-16	0	9.7	0.097	6.8	14113	15400	20.1	0.34	14.52%	0.701726
Spain	11	2002	8	2017	-15	0					17102	21.1	0.32	14.52%	0.70631
Spain	11	2003	9	2017	-14	0	11.3	0.113	7.6	12033	21512	21.7	0.32	12.05%	0.710679
Spain	11	2004	10	2017	-13	0					24950	22.7	0.33	12.05%	0.714886
Spain	11	2005	11	2017	-12	0					26460	24.2	0.32	12.05%	0.718717
Spain	11	2006	12	2017	-11	0	11.2	0.112	8.7	27934	28447	24.6	0.34	12.05%	0.72197
Spain	11	2007	13	2017	-10	0					32649	25.1	0.34	12.05%	0.725211
Spain	11	2008	14	2017	-9	0	10.1	0.101	7.1	23715	35577	25.4	0.34	10.28%	0.729411
Spain	11	2009	15	2017	-8	0	10.6	0.106	7.6	20109	32242	25.8	0.35	10.28%	0.733956
Spain	11	2010	16	2017	-7	0					30693	26.7	0.35	10.28%	0.738352
Spain	11	2011	17	2017	-6	0	9.6	0.096	7	22128	31823	27.5	0.36	10.28%	0.742096
Spain	11	2012	18	2017	-5	0					28479	27.9	0.35	10.28%	0.745182
Spain	11	2013	19	2017	-4	0	9.2	0.092	6.6	22335	29236	28.8	0.36	9.31%	0.747652
Spain	11	2014	20	2017	-3	0					29719	29.6	0.36	9.31%	0.749801
Spain	11	2015	21	2017	-2	0	9.5	0.095	7.3	22541	25992	29.9	0.36	9.31%	0.75227
Spain	11	2016	22	2017	-1	0					26753	30.4	0.36	9.31%	0.754758
Spain	11	2017	23	2017	0	1	11	0.11	9.1	21249	28395	30.9	0.35	9.31%	0.757663
Spain	11	2018	24	2017	1	1					30651	31.6	0.35	9.47%	0.76066
Spain	11	2019	25	2017	2	1					29798	32.9	0.34	9.47%	0.763943
Spain	11	2020	26	2017	3	1	10.5	0.105	8	17899	27214	34.0	0.35	9.47%	0.766506
Spain	11	2021	27	2017	4	1					30893	34.9	0.34	9.47%	0.769284
Spain	11	2022	28	2017	5	1	10.6	0.106	8.6	26344	30403	34.9	0.34	9.47%	0.769284
Spain	11	2023	29	2017	6	1					33896	34.9	0.34	10.38%	0.769284
Spain	11	2024	30	2017	7	1					33896	34.9	0.34	10.38%	0.769284
Switzerland	12	1994	0	2012	-18	0					43227	19.1	0.34	12.17%	0.873141
Switzerland	12	1995	1	2012	-17	0					50300	19.1	0.34	12.17%	0.874835
Switzerland	12	1996	2	2012	-16	0					48182		0.33	12.17%	0.876641
Switzerland	12	1997	3	2012	-15	0					41641		0.33	12.17%	0.878486
Switzerland	12	1998	4	2012	-14	0					42737		0.33	11.54%	0.880035
Switzerland	12	1999	5	2012	-13	0					41771	21.4	0.33	11.54%	0.882046
Switzerland	12	2000	6	2012	-12	0					38985	21.4	0.33	11.54%	0.885244
Switzerland	12	2001	7	2012	-11	0					39841	22.2	0.32	11.54%	0.888446
Switzerland	12	2002	8	2012	-10	0	5.8	0.058	3.2	14626	42667	22.4	0.32	11.54%	0.890903
Switzerland	12	2003	9	2012	-9	0					49517	23.7	0.32	11.81%	0.892781
Switzerland	12	2004	10	2012	-8	0					54786	24.8	0.32	11.81%	0.89491
Switzerland	12	2005	11	2012	-7	0					56402	25.3	0.34	11.81%	0.897273
Switzerland	12	2006	12	2012	-6	0			2.7		59239	26.2	0.34	11.81%	0.899962
Switzerland	12	2007	13	2012	-5	0	5.1	0.051		13606	65397	27.5	0.34	11.81%	0.902913
Switzerland	12	2008	14	2012	-4	0					74670	29.6	0.34	11.9%	0.905778
Switzerland	12	2009	15	2012	-3	0					71918	30.8	0.33	11.9%	0.90805
Switzerland	12	2010	16	2012	-2	0					76847	29.8	0.33	11.9%	0.910531
Switzerland	12	2011	17	2012	-1	0					90953	29.9	0.32	11.9%	0.913277
Switzerland	12	2012	18	2012	0	1	6.1	0.061	2.9	16267	86304	31.1	0.32	11.9%	0.915715
Switzerland	12	2013	19	2012	1	1					87918	33.0	0.32	11.45%	0.917955
Switzerland	12	2014	20	2012	2	1					89274	34.1	0.33	11.45%	0.919994
Switzerland	12	2015	21	2012	3	1					84225	35.3	0.32	11.45%	0.921833
Switzerland	12	2016	22	2012	4	1					82589	36.5	0.33	11.45%	0.923931
Switzerland	12	2017	23	2012	5	1	7.7	0.077	4.0	16979	82601	37.8	0.33	11.45%	0.926202
Switzerland	12	2018	24	2012	6	1					85561	38.6	0.33	10.44%	0.928551
Switzerland	12	2019	25	2012	7	1					84481	39.0	0.34	10.44%	0.930682
Switzerland	12	2020	26	2012	8	1					86139	39.7	0.34	10.44%	0.932028
Switzerland	12	2021	27	2012	9	1					93966	39.5	0.34	10.44%	0.933059
Switzerland	12	2022	28	2012	10	1	7.6	0.076	4.0	15462	94799	39.5	0.34	10.44%	0.933059
Switzerland	12	2023	29	2012	11	1					101510	39.5	0.34	9.89%	0.933059
Switzerland	12	2024	30	2012	12	1					101510	39.5	0.34	9.89%	0.933059
Hawaii	13	1994	0	2020	-26	0					27674	30.1	0.4	13.87%	0.780201
Hawaii	13	1995	1	2020	-25	0					28671	30.1	0.4	13.87%	0.785663
Hawaii	13	1996	2	2020	-24	0					29947		0.4	13.87%	0.790617
Hawaii	13	1997	3	2020	-23	0					31440		0.41	13.87%	0.794722
Hawaii	13	1998	4	2020	-22	0					32834		0.4	14.02%	0.795832
Hawaii	13	1999	5	2020	-21	0					34496	33.4	0.4	14.02%	0.797274
Hawaii	13	2000	6	2020	-20	0					36313	33.4	0.4	14.02%	0.800522
Hawaii	13	2001	7	2020	-19	0					37101	34.2	0.41	14.02%	0.804191
Hawaii	13	2002	8	2020	-18	0					37946	35.0	0.4	14.02%	0.807175
Hawaii	13	2003	9	2020	-17	0	12.6	0.126	8.0	651	39405	35.4	0.41	14.38%	0.810109
Hawaii	13	2004	10	2020	-16	0	11.6	0.116	7.4	714	41642	36.1	0.4	14.38%	0.813563
Hawaii	13	2005	11	2020	-15	0	12.5	0.125	7.5	556	44034	36.2	0.41	14.38%	0.814896
Hawaii	13	2006	12	2020	-14	0	11.4	0.114	6.4	478	46217	36.7	0.41	14.38%	0.814177
Hawaii	13	2007	13	2020	-13	0	9.4	0.094	5.4	956	47943	37.4	0.41	14.38%	0.815946
Hawaii	13	2008	14	2020	-12	0	10.6	0.106	7.2	405	48471	38.2	0.41	14.08%	0.820454
Hawaii	13	2009	15	2020	-11	0	12.6	0.126	9.1	441	47102	38.5	0.41	14.08%	0.825436
Hawaii	13	2010	16	2020	-10	0	12	0.12	8.0	578	48586	39.1	0.4	14.08%	0.829681
Hawaii	13	2011	17	2020	-9	0	12.6	0.126	7.2	581	50008	39.9	0.41	14.08%	0.834031
Hawaii	13	2012	18	2020	-8	0	14.3	0.143	8.3	754	51737	40.6	0.41	14.08%	0.838179
Hawaii	13	2013	19	2020	-7	0	13.8	0.138	8.9	605	53364	41.5	0.41	13.62%	0.84252
Hawaii	13	2014	20	2020	-6	0	12.5	0.125	7.92	1056	55264	42.2	0.42	13.62%	0.84642
Hawaii	13	2015	21	2020	-5	0	12.6	0.126	8.11	1257	57007	42.3	0.41	13.62%	0.849503
Hawaii	13	2016	22	2020	-4	0	13	0.13	8.32	1256	58180	43.5	0.41	13.62%	0.852192
Hawaii	13	2017	23	2020	-3	0	13.3	0.133	8.31	1119	60293	44.4	0.41	13.62%	0.855447
Hawaii	13	2018	24	2020	-2	0	14.6	0.146	9.11	1204	63165	45.2	0.41	13.01%	0.859154
Hawaii	13	2019	25	2020	-1	0	16.1	0.161	12.24	1188	65561	46.3	0.42	13.01%	0.864223
Hawaii	13	2020	26	2020	0	1					64462	48.1	0.4	13.01%	0.867878
Hawaii	13	2021	27	2020	1	1					71258	48.3	0.4	13.01%	0.869547
Hawaii	13	2022	28	2020	2	1	19	0.19	12.29	699	77980	48.3	0.41	13.01%	0.869547
Hawaii	13	2023	29	2020	3	1					82715	48.3	0.41	12.67%	0.869547
Hawaii	13	2024	30	2020	4	1					82715	48.3	0.41	12.67%	0.869547
Louisiana	14	1994	0	2021	-27	0					27674	30.1	0.4	13.87%	0.733052
Louisiana	14	1995	1	2021	-26	0					28671	30.1	0.4	13.87%	0.737563
Louisiana	14	1996	2	2021	-25	0					29947		0.4	13.87%	0.73984
Louisiana	14	1997	3	2021	-24	0					31440		0.41	13.87%	0.740649
Louisiana	14	1998	4	2021	-23	0					32834		0.4	14.02%	0.742007
Louisiana	14	1999	5	2021	-22	0					34496	33.4	0.4	14.02%	0.744576
Louisiana	14	2000	6	2021	-21	0					36313	33.4	0.4	14.02%	0.749807
Louisiana	14	2001	7	2021	-20	0					37101	34.2	0.41	14.02%	0.756026
Louisiana	14	2002	8	2021	-19	0					37946	35.0	0.4	14.02%	0.761098
Louisiana	14	2003	9	2021	-18	0	9	0.09	5.3	1028	39405	35.4	0.41	14.38%	0.765533
Louisiana	14	2004	10	2021	-17	0	8.1	0.081	4.5	1459	41642	36.1	0.4	14.38%	0.770637
Louisiana	14	2005	11	2021	-16	0	8.8	0.088	5.0	1007	44034	36.2	0.41	14.38%	0.77223
Louisiana	14	2006	12	2021	-15	0	9.2	0.092	5.0	889	46217	36.7	0.41	14.38%	0.770201
Louisiana	14	2007	13	2021	-14	0	9.8	0.098	4.7	735	47943	37.4	0.41	14.38%	0.771287
Louisiana	14	2008	14	2021	-13	0	8.3	0.083	4.4	955	48471	38.2	0.41	14.08%	0.776068
Louisiana	14	2009	15	2021	-12	0	7.7	0.077	4.6	1137	47102	38.5	0.41	14.08%	0.782617
Louisiana	14	2010	16	2021	-11	0	7.6	0.076	4.3	1199	48586	39.1	0.4	14.08%	0.789358
Louisiana	14	2011	17	2021	-10	0	8.1	0.081	4.4	681	50008	39.9	0.41	14.08%	0.793483
Louisiana	14	2012	18	2021	-9	0	10.2	0.102	4.7	1029	51737	40.6	0.41	14.08%	0.796138
Louisiana	14	2013	19	2021	-8	0	10.5	0.105	4.9	1001	53364	41.5	0.41	13.62%	0.798684
Louisiana	14	2014	20	2021	-7	0	11.2	0.112	6.17	1277	55264	42.2	0.42	13.62%	0.801748
Louisiana	14	2015	21	2021	-6	0	11.4	0.114	6.43	1417	57007	42.3	0.41	13.62%	0.806552
Louisiana	14	2016	22	2021	-5	0	11.3	0.113	6.94	1573	58180	43.5	0.41	13.62%	0.811534
Louisiana	14	2017	23	2021	-4	0	12.5	0.125	7.80	1396	60293	44.4	0.41	13.62%	0.815666
Louisiana	14	2018	24	2021	-3	0	12.5	0.125	7.96	1372	63165	45.2	0.41	13.01%	0.818981
Louisiana	14	2019	25	2021	-2	0	12.5	0.125	9.73	1276	65561	46.3	0.42	13.01%	0.82202
Louisiana	14	2020	26	2021	-1	0					64462	48.1	0.4	13.01%	0.823862
Louisiana	14	2021	27	2021	0	1					71258	48.3	0.4	13.01%	0.825346
Louisiana	14	2022	28	2021	1	1	20.5	0.205	13.82	841	77980	48.3	0.41	13.01%	0.825346
Louisiana	14	2023	29	2021	2	1					82715	48.3	0.41	12.67%	0.825346
Louisiana	14	2024	30	2021	3	1					82715	48.3	0.41	12.67%	0.825346
New Hampshire	15	1994	0	2017	-23	0					27674	30.1	0.4	13.87%	0.824704
New Hampshire	15	1995	1	2017	-22	0					28671	30.1	0.4	13.87%	0.826109
New Hampshire	15	1996	2	2017	-21	0					29947		0.4	13.87%	0.827137
New Hampshire	15	1997	3	2017	-20	0					31440		0.41	13.87%	0.82901
New Hampshire	15	1998	4	2017	-19	0					32834		0.4	14.02%	0.832449
New Hampshire	15	1999	5	2017	-18	0					34496	33.4	0.4	14.02%	0.835976
New Hampshire	15	2000	6	2017	-17	0					36313	33.4	0.4	14.02%	0.840296
New Hampshire	15	2001	7	2017	-16	0					37101	34.2	0.41	14.02%	0.84544
New Hampshire	15	2002	8	2017	-15	0					37946	35.0	0.4	14.02%	0.849706
New Hampshire	15	2003	9	2017	-14	0	16.9	0.169	10.7	562	39405	35.4	0.41	14.38%	0.852483
New Hampshire	15	2004	10	2017	-13	0	15.3	0.153	9.4	683	41642	36.1	0.4	14.38%	0.854433
New Hampshire	15	2005	11	2017	-12	0	12.8	0.128	7.7	745	44034	36.2	0.41	14.38%	0.855162
New Hampshire	15	2006	12	2017	-11	0	12.6	0.126	7.4	735	46217	36.7	0.41	14.38%	0.855703
New Hampshire	15	2007	13	2017	-10	0	14.6	0.146	8.7	767	47943	37.4	0.41	14.38%	0.857403
New Hampshire	15	2008	14	2017	-9	0	14.6	0.146	9.3	709	48471	38.2	0.41	14.08%	0.86065
New Hampshire	15	2009	15	2017	-8	0	15.2	0.152	9.9	825	47102	38.5	0.41	14.08%	0.864739
New Hampshire	15	2010	16	2017	-7	0	15.6	0.156	9.9	694	48586	39.1	0.4	14.08%	0.868736
New Hampshire	15	2011	17	2017	-6	0	13.6	0.136	7.9	784	50008	39.9	0.41	14.08%	0.872429
New Hampshire	15	2012	18	2017	-5	0	14.6	0.146	8.4	1087	51737	40.6	0.41	14.08%	0.875756
New Hampshire	15	2013	19	2017	-4	0	15.2	0.152	9.8	1714	53364	41.5	0.41	13.62%	0.878502
New Hampshire	15	2014	20	2017	-3	0	16.9	0.169	11.66	1224	55264	42.2	0.42	13.62%	0.881402
New Hampshire	15	2015	21	2017	-2	0	17.4	0.174	12.31	1271	57007	42.3	0.41	13.62%	0.885203
New Hampshire	15	2016	22	2017	-1	0	17.9	0.179	12.42	1275	58180	43.5	0.41	13.62%	0.888805
New Hampshire	15	2017	23	2017	0	1	18.9	0.189	13.28	1361	60293	44.4	0.41	13.62%	0.891794
New Hampshire	15	2018	24	2017	1	1	20.9	0.209	14.72	1170	63165	45.2	0.41	13.01%	0.894405
New Hampshire	15	2019	25	2017	2	1	21.9	0.219	16.16	1077	65561	46.3	0.42	13.01%	0.896504
New Hampshire	15	2020	26	2017	3	1					64462	48.1	0.4	13.01%	0.897426
New Hampshire	15	2021	27	2017	4	1					71258	48.3	0.4	13.01%	0.898264
New Hampshire	15	2022	28	2017	5	1	20.6	0.206	15.13	753	77980	48.3	0.41	13.01%	0.898264
New Hampshire	15	2023	29	2017	6	1					82715	48.3	0.41	12.67%	0.898264
New Hampshire	15	2024	30	2017	7	1					82715	48.3	0.41	12.67%	0.898264
North Dakota	16	1994	0	2019	-25	0					27674	30.1	0.4	13.87%	0.783372
North Dakota	16	1995	1	2019	-24	0					28671	30.1	0.4	13.87%	0.786798
North Dakota	16	1996	2	2019	-23	0					29947		0.4	13.87%	0.790928
North Dakota	16	1997	3	2019	-22	0					31440		0.41	13.87%	0.794868
North Dakota	16	1998	4	2019	-21	0					32834		0.4	14.02%	0.799169
North Dakota	16	1999	5	2019	-20	0					34496	33.4	0.4	14.02%	0.802966
North Dakota	16	2000	6	2019	-19	0					36313	33.4	0.4	14.02%	0.806593
North Dakota	16	2001	7	2019	-18	0					37101	34.2	0.41	14.02%	0.809256
North Dakota	16	2002	8	2019	-17	0					37946	35.0	0.4	14.02%	0.81089
North Dakota	16	2003	9	2019	-16	0	8.9	0.089	4.4	820	39405	35.4	0.41	14.38%	0.81204
North Dakota	16	2004	10	2019	-15	0	9.2	0.092	4.8	1179	41642	36.1	0.4	14.38%	0.812489
North Dakota	16	2005	11	2019	-14	0	7.6	0.076	3.9	1123	44034	36.2	0.41	14.38%	0.812433
North Dakota	16	2006	12	2019	-13	0	6.2	0.062	3.2	1063	46217	36.7	0.41	14.38%	0.812481
North Dakota	16	2007	13	2019	-12	0	7.8	0.078	4.2	1150	47943	37.4	0.41	14.38%	0.814359
North Dakota	16	2008	14	2019	-11	0	8.1	0.081	4.7	814	48471	38.2	0.41	14.08%	0.817757
North Dakota	16	2009	15	2019	-10	0	8.1	0.081	4.5	753	47102	38.5	0.41	14.08%	0.821289
North Dakota	16	2010	16	2019	-9	0	8.3	0.083	3.9	955	48586	39.1	0.4	14.08%	0.825293
North Dakota	16	2011	17	2019	-8	0	8.1	0.081	4.1	883	50008	39.9	0.41	14.08%	0.829076
North Dakota	16	2012	18	2019	-7	0	9.1	0.091	4.9	1242	51737	40.6	0.41	14.08%	0.833703
North Dakota	16	2013	19	2019	-6	0	9.5	0.095	5.1	869	53364	41.5	0.41	13.62%	0.83919
North Dakota	16	2014	20	2019	-5	0	10.25	0.1025	5.79	1599	55264	42.2	0.42	13.62%	0.84572
North Dakota	16	2015	21	2019	-4	0	9.7	0.097	5.92	1780	57007	42.3	0.41	13.62%	0.852727
North Dakota	16	2016	22	2019	-3	0	9.6	0.096	5.61	1522	58180	43.5	0.41	13.62%	0.858732
North Dakota	16	2017	23	2019	-2	0	11	0.11	6.57	1407	60293	44.4	0.41	13.62%	0.863329
North Dakota	16	2018	24	2019	-1	0	12.2	0.122	7.87	1530	63165	45.2	0.41	13.01%	0.866778
North Dakota	16	2019	25	2019	0	1	13	0.13	9.36	1504	65561	46.3	0.42	13.01%	0.869464
North Dakota	16	2020	26	2019	1	1					64462	48.1	0.4	13.01%	0.871463
North Dakota	16	2021	27	2019	2	1					71258	48.3	0.4	13.01%	0.873032
North Dakota	16	2022	28	2019	3	1	18.6	0.186	11.97	606	77980	48.3	0.41	13.01%	0.873032
North Dakota	16	2023	29	2019	4	1					82715	48.3	0.41	12.67%	0.873032
North Dakota	16	2024	30	2019	5	1					82715	48.3	0.41	12.67%	0.873032
Sweden	17	1994	0	2017	-23	0					25941	23.6	0.25	12.37%	0.8067
Sweden	17	1995	1	2017	-22	0					30218	23.6	0.25	12.37%	0.812245
Sweden	17	1996	2	2017	-21	0					33010		0.25	12.37%	0.817227
Sweden	17	1997	3	2017	-20	0					30319		0.25	12.37%	0.821694
Sweden	17	1998	4	2017	-19	0					30594		0.27	11.56%	0.825732
Sweden	17	1999	5	2017	-18	0					30957	23.0	0.27	11.56%	0.829487
Sweden	17	2000	6	2017	-17	0					29597	23.0	0.27	11.56%	0.833028
Sweden	17	2001	7	2017	-16	0					27219	23.8	0.27	11.56%	0.835956
Sweden	17	2002	8	2017	-15	0					29905	24.6	0.26	11.56%	0.838742
Sweden	17	2003	9	2017	-14	0					37220	25.4	0.25	12.31%	0.841663
Sweden	17	2004	10	2017	-13	0	2.2976	0.023	0.8	9434	42674	26.2	0.26	12.31%	0.844507
Sweden	17	2005	11	2017	-12	0	2.03616	0.02	0.8	4605	43292	27.0	0.27	12.31%	0.846876
Sweden	17	2006	12	2017	-11	0	2.06161	0.021	0.6	4603	46364	27.7	0.26	12.31%	0.849116
Sweden	17	2007	13	2017	-10	0	2.21531	0.022	0.6	4358	53366	28.4	0.27	12.31%	0.851421
Sweden	17	2008	14	2017	-9	0	2.12196	0.021	0.5	8252	55596	26.9	0.28	13.43%	0.853706
Sweden	17	2009	15	2017	-8	0	3.19974	0.032	0.9	7558	46497	27.5	0.27	13.43%	0.855703
Sweden	17	2010	16	2017	-7	0	3.01387	0.03	1	7193	52334	28.1	0.28	13.43%	0.858728
Sweden	17	2011	17	2017	-6	0	2.90549	0.029	0.9	6776	60166	28.8	0.28	13.43%	0.861892
Sweden	17	2012	18	2017	-5	0	3.37815	0.034	0.9	6779	57529	29.4	0.28	13.43%	0.864707
Sweden	17	2013	19	2017	-4	0	3.17243	0.032	0.9	6747	60564	30.0	0.29	12.22%	0.867384
Sweden	17	2014	20	2017	-3	0	3.32741	0.033	0.7	6486	59270	30.6	0.28	12.22%	0.869923
Sweden	17	2015	21	2017	-2	0	3.63311	0.036	0.9	6641	50929	31.1	0.29	12.22%	0.872389
Sweden	17	2016	22	2017	-1	0	3.87855	0.039	1.1	6351	51447	31.6	0.3	12.22%	0.874662
Sweden	17	2017	23	2017	0	0					52971	32.2	0.29	12.22%	0.877121
Sweden	17	2018	24	2017	1	0	4.55632	0.046	1.4	10856	53891	32.8	0.3	10.89%	0.879889
Sweden	17	2019	25	2017	2	0					51529	33.3	0.29	10.89%	0.882984
Sweden	17	2020	26	2017	3	0	4.56978	0.046	1	10802	52523	33.9	0.29	10.89%	0.885062
Sweden	17	2021	27	2017	4	0	3.91296	0.039	1.2	11324	60961	34.5	0.3	10.89%	0.88688
Sweden	17	2022	28	2017	5	0	3.92338	0.039	1.2	9957	55115	34.5	0.3	10.89%	0.88688
Sweden	17	2023	29	2017	6	0					55433	34.5	0.3	11.52%	0.88688
Sweden	17	2024	30	2017	7	0	3.92816	0.039	1.1	10286	55433	34.5	0.3	11.52%	0.88688
