# Supplementary material for: Expected population prevalence following decriminalization of recreational use of cannabis in Sweden
Source: J Cannabis Res. 2026 Feb 13;8:32. doi: 10.1186/s42238-026-00405-z (PMC12930985; doi:10.1186/s42238-026-00405-z)
Supplement: Supplementary file 3 — Supplementary Material 3. [file 42238_2026_405_MOESM3_ESM.docx]

# Supplementary material for: Expected population outcomes following decriminalization of recreational use of cannabis in Sweden

Filip Andersson, MSc1,2, Robert Thiesmeier, MSc1, Cecilia Magnusson, PhD1,2, Nicola Orsini, PhD1,2, Mats Ramstedt, PhD3,4, Maria Rosaria Galanti, PhD1

1Department of Global Public Health, Karolinska Institutet, SE-17177 Stockholm, Sweden; 2Centre for Epidemiology and Community Medicine, Stockholm Health Care District, Stockholm Region, Box 45436 10431 Stockholm, Sweden; 3Department of Clinical Neuroscience, Karolinska Institutet, SE-17177 Stockholm, Sweden; 4The Swedish Council for Information on Alcohol and Other Drugs, Östergötagatan 90 11664 Stockholm, Sweden

Appendix A3

# **Stata codes**

## Yearly cannabis use

///Decriminalization effect

clear

import excel “Appendix A2.xlsx", sheet("Data") firstrow

///drop if ID==1

///drop if ID==16 | ID==15 | ID==14 | ID==13 ///Without US

set cformat %9.3f

gen time = T0int*Xt

gen N_cannabis = Prevalence*N

destring educ, replace force

gen educ_prec = educ/100

rename _24 young_adults

replace young_adults = subinstr(young_adults,"%", "",.)

destring young_adults, replace force

gen young_adults_prec = young_adults/100

drop educ

drop young_adults

rename educ_prec educ

rename young_adults_prec young_adults

gen GDP_1000 = GDP/1000

gen GDP_10000 = GDP/10000

meta esize N_cannabis N, esize(prop) random

sort Country Year

xtset ID Year, yearly

///// Predefined model: a+b1*year+b2*intervention+b3*time_since_intervention

replace Xt = 0 if Country=="Sweden" & Year>2016

replace time = T0int*Xt if Country=="Sweden" & Year>2016

meta meregress Prevalence c.Xt c.time, noconstant || Country:year , essevariable(_meta_se)

estimates store EY1

lincom Xt*100

lincom time*100

predict Phat1re1 Phat1re2, reffects

replace Xt = 1 if Country=="Sweden" & Year>2016

replace time = T0int*Xt if Country=="Sweden" & Year>2016

predict Phat1fe, xb

predict Phat1stdp1, stdp

gen Phat1 = Phat1re1*year+Phat1re2+Phat1fe

generate Phat1lb_100 = (Phat1 - invnormal(0.975)*Phat1stdp1)*100

generate Phat1ub_100 = (Phat1 + invnormal(0.975)*Phat1stdp1)*100

gen Phat0 = Phat1re1*year+Phat1re2

gen Phat1_100 = Phat1*100

gen Phat0_100 = Phat0*100

gen Prevalence_100 = Prevalence*100

tw (scatter Prevalence_100 Year if Country=="Sweden" & Year>2002) (line Phat1_100 Year if Country=="Sweden" & Year>2002) (line Phat1lb_100 Year if Country=="Sweden" & Year>2002) (line Phat1ub_100 Year if Country=="Sweden" & Year>2002) (line Phat0_100 Year if Country=="Sweden" & Year>2002), yscale(range(0,6))

///// Predefined model: a+b1*year+b2*intervention*gini+b3*time_since_intervention*gini

replace Xt = 0 if Country=="Sweden" & Year>2016

replace time = T0int*Xt if Country=="Sweden" & Year>2016

meta meregress Prevalence c.Xt#c.GINI c.time#c.GINI , noconstant || Country:year , essevariable(_meta_se)

estimates store EY2

lincom c.Xt#c.GINI*100

lincom c.time#c.GINI*100

predict Phat2re1 Phat2re2, reffects

replace Xt = 1 if Country=="Sweden" & Year>2016

replace time = T0int*Xt if Country=="Sweden" & Year>2016

predict Phat2fe, xb

gen Phat2 = Phat2re1*year+Phat2re2+Phat2fe

gen Phat2_100 = Phat2*100

tw (scatter Prevalence_100 Year if Country=="Sweden" & Year>2002) (line Phat2_100 Year if Country=="Sweden" & Year>2002) (line Phat0_100 Year if Country=="Sweden" & Year>2002), yscale(range(0,6))

///// Predefined model: a+b1*year+b2*intervention*educ+b3*time_since_intervention*educ

replace Xt = 0 if Country=="Sweden" & Year>2016

replace time = T0int*Xt if Country=="Sweden" & Year>2016

meta meregress Prevalence c.Xt#c.educ c.time#c.educ , noconstant || Country:year , essevariable(_meta_se)

estimates store EY3

lincom c.Xt#c.educ*100

lincom c.time#c.educ*100

predict Phat3re1 Phat3re2, reffects

replace Xt = 1 if Country=="Sweden" & Year>2016

replace time = T0int*Xt if Country=="Sweden" & Year>2016

predict Phat3fe, xb

gen Phat3 = Phat3re1*year+Phat3re2+Phat3fe

gen Phat3_100 = Phat3*100

tw (scatter Prevalence_100 Year if Country=="Sweden" & Year>2002) (line Phat3_100 Year if Country=="Sweden" & Year>2002) (line Phat0_100 Year if Country=="Sweden" & Year>2002), yscale(range(0,6))

///// Predefined model: a+b1*year+b2*intervention*gdp+b3*time_since_intervention*gdp

replace Xt = 0 if Country=="Sweden" & Year>2016

replace time = T0int*Xt if Country=="Sweden" & Year>2016

//meta meregress Prevalence c.Xt#c.GDP_1000 c.time#c.GDP_1000 , noconstant || Country:year , essevariable(_meta_se)

meta meregress Prevalence c.Xt#c.GDP_10000 c.time#c.GDP_10000 , noconstant || Country:year , essevariable(_meta_se)

estimates store EY4

lincom c.Xt#c.GDP_10000*100

lincom c.time#c.GDP_10000*100

predict Phat4re1 Phat4re2, reffects

replace Xt = 1 if Country=="Sweden" & Year>2016

replace time = T0int*Xt if Country=="Sweden" & Year>2016

predict Phat4fe, xb

gen Phat4 = Phat4re1*year+Phat4re2+Phat4fe

gen Phat4_100 = Phat4*100

tw (scatter Prevalence_100 Year if Country=="Sweden" & Year>2002) (line Phat4_100 Year if Country=="Sweden" & Year>2002) (line Phat0_100 Year if Country=="Sweden" & Year>2002), yscale(range(0,6))

///// Predefined model: a+b1*year+b2*intervention*SDI+b3*time_since_intervention*SDI

replace Xt = 0 if Country=="Sweden" & Year>2016

replace time = T0int*Xt if Country=="Sweden" & Year>2016

meta meregress Prevalence c.Xt#c.SDI c.time#c.SDI , noconstant || Country:year , essevariable(_meta_se)

estimates store EY5

lincom c.Xt#c.SDI*100

lincom c.time#c.SDI*100

predict Phat5re1 Phat5re2, reffects

replace Xt = 1 if Country=="Sweden" & Year>2016

replace time = T0int*Xt if Country=="Sweden" & Year>2016

predict Phat5fe, xb

gen Phat5 = Phat5re1*year+Phat5re2+Phat5fe

gen Phat5_100 = Phat5*100

tw (scatter Prevalence_100 Year if Country=="Sweden" & Year>2002) (line Phat5_100 Year if Country=="Sweden" & Year>2002) (line Phat0_100 Year if Country=="Sweden" & Year>2002), yscale(range(0,6))

///// Predefined model: a+b1*year+b2*intervention*age+b3*time_since_intervention*age

replace Xt = 0 if Country=="Sweden" & Year>2016

replace time = T0int*Xt if Country=="Sweden" & Year>2016

meta meregress Prevalence c.Xt#c.young_adults c.time#c.young_adults , noconstant || Country:year , essevariable(_meta_se)

estimates store EY6

predict Phat6re1 Phat6re2, reffects

lincom c.Xt#c.young_adults*100

lincom c.time#c.young_adults*100

replace Xt = 1 if Country=="Sweden" & Year>2016

replace time = T0int*Xt if Country=="Sweden" & Year>2016

predict Phat6fe, xb

gen Phat6 = Phat6re1*year+Phat6re2+Phat6fe

gen Phat6_100 = Phat6*100

tw (scatter Prevalence_100 Year if Country=="Sweden" & Year>2002) (line Phat6_100 Year if Country=="Sweden" & Year>2002) (line Phat0_100 Year if Country=="Sweden" & Year>2002), yscale(range(0,6))

estimates stats EY1 EY2 EY3 EY4 EY5 EY6, all

///////////Graphical presentations

ssc install grstyle //if grstyle not installed

grstyle init

grstyle set plain, grid

grstyle set color d3

grstyle set legend 2, nobox

grstyle set graphsize 10cm 15cm

grstyle set size 8pt: heading

grstyle set size 6pt: subheading axis_title

grstyle set size 5pt: subheading axis_title_gap

grstyle set size 4pt: tick_label key_label

grstyle set symbolsize 3 4 5, pt

grstyle set linewidth .8pt: plineplot

grstyle set linewidth .4pt: legend axisline tick major_grid

grstyle set linewidth 0: pmark

grstyle set margin 0.3cm

twoway (scatter Prevalence_100 Year if Country=="Sweden" & Year>2002, sort) (line Phat0_100 Year if Country=="Sweden" & Year>2002) (line Phat1_100 Year if Country=="Sweden" & Year>2002) (line Phat2_100 Year if Country=="Sweden" & Year>2002) (line Phat3_100 Year if Country=="Sweden" & Year>2002) (line Phat4_100 Year if Country=="Sweden" & Year>2002) (line Phat5_100 Year if Country=="Sweden" & Year>2002) (line Phat6_100 Year if Country=="Sweden" & Year>2002), title("Predicted yearly observed prevalences of cannabis use in Sweden with and without decriminalization") subtitle("Comparing different models") xtitle("Year") ytitle("Prevalence in precentage") legend(order(1 "Observed prevalence" 2 "No decriminalization" 3 "Only time" 4 "Time*Gini" 5 "Time*educational attainment" 6 "Time*GDP/10000 per capita" 7 "Time*SDI" 8 "Time*young adults")) yscale(range(0,6)) ytick(0(1)6) ylabel(0 1 2 3 4 5 6)

drop if ID==17

xtline Prevalence_100 if Country != "Sweden", recast(scatter) addplot((line Phat1_100 Year if Country != "Sweden")) ylabel(0(5)20) legend(order(1 "Observed prevalence" 2 "Only time"))

## Monthly cannabis use

///Decriminalization effect

clear

import excel “Appendix A2.xlsx", sheet("Data") firstrow

//drop if ID==1

///drop if ID==16 | ID==15 | ID==14 | ID==13 ///Without US

set cformat %9.3f

gen time = T0int*Xt

destring Share_M, replace force

gen Prevalence_M = Share_M/100

gen N_cannabis = Prevalence_M*N

destring educ, replace force

gen educ_prec = educ/100

rename _24 young_adults

replace young_adults = subinstr(young_adults,"%", "",.)

destring young_adults, replace force

gen young_adults_prec = young_adults/100

drop educ

drop young_adults

rename educ_prec educ

rename young_adults_prec young_adults

gen GDP_1000 = GDP/1000

gen GDP_10000 = GDP/10000

meta esize N_cannabis N, esize(prop) random

sort Country Year

xtset ID Year, yearly

///// Predefined model: a+b1*year+b2*intervention+b3*time_since_intervention

replace Xt = 0 if Country=="Sweden" & Year>2016

replace time = T0int*Xt if Country=="Sweden" & Year>2016

meta meregress Prevalence_M c.Xt c.time , noconstant || Country:year , essevariable(_meta_se)

estimates store EM1

lincom Xt*100

lincom time*100

predict Phat1re1 Phat1re2, reffects

replace Xt = 1 if Country=="Sweden" & Year>2016

replace time = T0int*Xt if Country=="Sweden" & Year>2016

predict Phat1fe, xb

predict Phat1stdp1, stdp

gen Phat1 = Phat1re1*year+Phat1re2+Phat1fe

generate Phat1lb_100 = (Phat1 - invnormal(0.975)*Phat1stdp1)*100

generate Phat1ub_100 = (Phat1 + invnormal(0.975)*Phat1stdp1)*100

gen Phat0 = Phat1re1*year+Phat1re2

gen Phat1_100 = Phat1*100

gen Phat0_100 = Phat0*100

gen Prevalence_100 = Prevalence_M*100

tw (scatter Prevalence_100 Year if Country=="Sweden" & Year>2002) (line Phat1_100 Year if Country=="Sweden" & Year>2002) (line Phat1lb_100 Year if Country=="Sweden" & Year>2002) (line Phat1ub_100 Year if Country=="Sweden" & Year>2002) (line Phat0_100 Year if Country=="Sweden" & Year>2002), yscale(range(0,2))

///// Predefined model: a+b1*year+b2*intervention*gini+b3*time_since_intervention*gini

replace Xt = 0 if Country=="Sweden" & Year>2016

replace time = T0int*Xt if Country=="Sweden" & Year>2016

meta meregress Prevalence_M c.Xt#c.GINI c.time#c.GINI, noconstant || Country:year , essevariable(_meta_se)

estimates store EM2

lincom c.Xt#c.GINI*100

lincom c.time#c.GINI*100

predict Phat2re1 Phat2re2, reffects

replace Xt = 1 if Country=="Sweden" & Year>2016

replace time = T0int*Xt if Country=="Sweden" & Year>2016

predict Phat2fe, xb

gen Phat2 = Phat2re1*year+Phat2re2+Phat2fe

gen Phat2_100 = Phat2*100

tw (scatter Prevalence_100 Year if Country=="Sweden" & Year>2002) (line Phat2_100 Year if Country=="Sweden" & Year>2002) (line Phat0_100 Year if Country=="Sweden" & Year>2002), yscale(range(0,2))

///// Predefined model: a+b1*year+b2*intervention*educ+b3*time_since_intervention*educ

replace Xt = 0 if Country=="Sweden" & Year>2016

replace time = T0int*Xt if Country=="Sweden" & Year>2016

meta meregress Prevalence_M c.Xt#c.educ c.time#c.educ, noconstant || Country:year , essevariable(_meta_se)

estimates store EM3

lincom c.Xt#c.educ*100

lincom c.time#c.educ*100

predict Phat3re1 Phat3re2, reffects

replace Xt = 1 if Country=="Sweden" & Year>2016

replace time = T0int*Xt if Country=="Sweden" & Year>2016

predict Phat3fe, xb

gen Phat3 = Phat3re1*year+Phat3re2+Phat3fe

gen Phat3_100 = Phat3*100

tw (scatter Prevalence_100 Year if Country=="Sweden" & Year>2002) (line Phat3_100 Year if Country=="Sweden" & Year>2002) (line Phat0_100 Year if Country=="Sweden" & Year>2002), yscale(range(0,2))

///// Predefined model: a+b1*year+b2*intervention*gdp+b3*time_since_intervention*gdp

replace Xt = 0 if Country=="Sweden" & Year>2016

replace time = T0int*Xt if Country=="Sweden" & Year>2016

meta meregress Prevalence_M c.Xt#c.GDP_10000 c.time#c.GDP_10000, noconstant || Country:year , essevariable(_meta_se)

estimates store EM4

lincom c.Xt#c.GDP_10000*100

lincom c.time#c.GDP_10000*100

predict Phat4re1 Phat4re2, reffects

replace Xt = 1 if Country=="Sweden" & Year>2016

replace time = T0int*Xt if Country=="Sweden" & Year>2016

predict Phat4fe, xb

gen Phat4 = Phat4re1*year+Phat4re2+Phat4fe

gen Phat4_100 = Phat4*100

tw (scatter Prevalence_100 Year if Country=="Sweden" & Year>2002) (line Phat4_100 Year if Country=="Sweden" & Year>2002) (line Phat0_100 Year if Country=="Sweden" & Year>2002), yscale(range(0,2))

///// Predefined model: a+b1*year+b2*intervention*SDI+b3*time_since_intervention*SDI

replace Xt = 0 if Country=="Sweden" & Year>2016

replace time = T0int*Xt if Country=="Sweden" & Year>2016

meta meregress Prevalence_M c.Xt#c.SDI c.time#c.SDI, noconstant || Country:year , essevariable(_meta_se)

estimates store EM5

lincom c.Xt#c.SDI*100

lincom c.time#c.SDI*100

predict Phat5re1 Phat5re2, reffects

replace Xt = 1 if Country=="Sweden" & Year>2016

replace time = T0int*Xt if Country=="Sweden" & Year>2016

predict Phat5fe, xb

gen Phat5 = Phat5re1*year+Phat5re2+Phat5fe

gen Phat5_100 = Phat5*100

tw (scatter Prevalence_100 Year if Country=="Sweden" & Year>2002) (line Phat5_100 Year if Country=="Sweden" & Year>2002) (line Phat0_100 Year if Country=="Sweden" & Year>2002), yscale(range(0,2))

///// Predefined model: a+b1*year+b2*intervention*age+b3*time_since_intervention*age

replace Xt = 0 if Country=="Sweden" & Year>2016

replace time = T0int*Xt if Country=="Sweden" & Year>2016

meta meregress Prevalence_M c.Xt#c.young_adults c.time#c.young_adults, noconstant || Country:year , essevariable(_meta_se)

estimates store EM6

lincom c.Xt#c.young_adults*100

lincom c.time#c.young_adults*100

predict Phat6re1 Phat6re2, reffects

replace Xt = 1 if Country=="Sweden" & Year>2016

replace time = T0int*Xt if Country=="Sweden" & Year>2016

predict Phat6fe, xb

gen Phat6 = Phat6re1*year+Phat6re2+Phat6fe

gen Phat6_100 = Phat6*100

tw (scatter Prevalence_100 Year if Country=="Sweden" & Year>2002) (line Phat6_100 Year if Country=="Sweden" & Year>2002) (line Phat0_100 Year if Country=="Sweden" & Year>2002), yscale(range(0,2))

estimates stats EM1 EM2 EM3 EM4 EM5 EM6, all

///////////Graphical presentations

grstyle init

grstyle set plain, grid

grstyle set color d3

grstyle set legend 2, nobox

grstyle set graphsize 10cm 15cm

grstyle set size 8pt: heading

grstyle set size 6pt: subheading axis_title

grstyle set size 5pt: subheading axis_title_gap

grstyle set size 4pt: tick_label key_label

grstyle set symbolsize 3 4 5, pt

grstyle set linewidth .8pt: plineplot

grstyle set linewidth .4pt: legend axisline tick major_grid

grstyle set linewidth 0: pmark

grstyle set margin 0.3cm

twoway (scatter Prevalence_100 Year if Country=="Sweden" & Year>2002, sort) (line Phat0_100 Year if Country=="Sweden" & Year>2002) (line Phat1_100 Year if Country=="Sweden" & Year>2002) (line Phat2_100 Year if Country=="Sweden" & Year>2002) (line Phat3_100 Year if Country=="Sweden" & Year>2002) (line Phat4_100 Year if Country=="Sweden" & Year>2002) (line Phat5_100 Year if Country=="Sweden" & Year>2002) (line Phat6_100 Year if Country=="Sweden" & Year>2002), title("Predicted monthly observed prevalences of cannabis use in Sweden with and without decriminalization") subtitle("Comparing different models") xtitle("Year") ytitle("Prevalence in percentage") legend(order(1 "Observed prevalence" 2 "No decriminalization" 3 "Only time" 4 "Time*Gini" 5 "Time*educational attainment" 6 "Time*GDP/10000 per capita" 7 "Time*SDI" 8 "Time*young adults")) yscale(range(0,2)) ytick(0(1)2) ylabel(0 1 2)

drop if ID==17

xtline Prevalence_100 if Country != "Sweden", recast(scatter) addplot((line Phat1_100 Year if Country != "Sweden")) ylabel(0(5)20) legend(order(1 "Observed prevalence" 2 "Only time"))
